# Supplementary material for: Enhanced daytime secondary aerosol formation driven by gas-particle partitioning in downwind urban plumes
Source: Copernicus journal article supplement (doi:10.5194/egusphere-2024-887), 2024-05-13
Supplement: Supplementary file 1 [file egusphere-2024-887-supplement.pdf]

1 **Supporting information (SI): Enhanced daytime secondary**  
2 **aerosol formation driven by gas-particle partitioning in**  
3 **downwind urban plumes**

4 Mingfu Cai<sup>1,2,3</sup>, Ye Chenshuo<sup>4</sup>, Bin Yuan<sup>2,3\*</sup>, Shan Huang<sup>2,3</sup>, E Zheng<sup>2,3</sup>, Suxia Yang<sup>5</sup>,  
5 Zelong Wang<sup>2,3</sup>, Yi Lin<sup>2,3</sup>, Tiange Li<sup>2,3</sup>, Weiwei Hu<sup>6</sup>, Wei Chen<sup>6</sup>, Qicong Song<sup>2,3</sup>, Wei  
6 Li<sup>2,3</sup>, Yuwen Peng<sup>2,3</sup>, Baoling Liang<sup>7</sup>, Qibin Sun<sup>7</sup>, Jun Zhao<sup>7</sup>, Duohong Chen<sup>8</sup>, Jiaren  
7 Sun<sup>1</sup>, Zhiyong Yang<sup>9</sup>, Min Shao<sup>2,3</sup>

8 <sup>1</sup>Guangdong Province Engineering Laboratory for Air Pollution Control, Guangdong  
9 Provincial Key Laboratory of Water and Air Pollution Control, South China Institute of Environmental  
10 Sciences, MEE, Guangzhou, Guangdong 510655, China

11 <sup>2</sup>Institute for Environmental and Climate Research, Jinan University, 51143, Guangzhou, China

12 <sup>3</sup>Guangdong-Hongkong-Macau Joint Laboratory of Collaborative Innovation for Environmental  
13 Quality, Guangzhou, China

14 <sup>4</sup> Guangdong Provincial Academy of Environmental Science, Guangzhou, 510045, China

15 <sup>5</sup> Guangzhou Research Institute of Environment Protection Co.,Ltd, Guangzhou 510620, China

16 <sup>6</sup>State Key Laboratory of Organic Geochemistry and Guangdong Key Laboratory of Environmental  
17 Protection and Resources Utilization, Guangzhou Institute of Geochemistry, Chinese Academy of  
18 Sciences, Guangzhou 510640, China

19 <sup>7</sup>School of Atmospheric Sciences, Guangdong Province Key Laboratory for Climate Change and  
20 Natural Disaster Studies, and Institute of Earth Climate and Environment System, Sun Yat-sen  
21 University, Zhuhai, Guangdong 519082, China

22 <sup>8</sup>Guangdong Environmental Monitoring Center, Guangzhou 510308, China

23 <sup>9</sup>Guangzhou Huangpu District Meteorological Bureau, Guangzhou 510530, China

24

25

26 *\*Corresponding authors: Bin Yuan (byuan@jnu.edu.cn)*

27

28 Table S1. Fitting parameters  $a$  and  $b$  of different calibration experiments.

| Experiment No. | Particle diameter (nm) | Mass loading (ng) | $a$    | $b$   |
|----------------|------------------------|-------------------|--------|-------|
| 1              | 200                    | 150.7             | -0.197 | 1.056 |
| 2              | 200                    | 241               | -0.167 | 1.768 |
| 3              | 200                    | 407               | -0.206 | 3.732 |
| 4              | 100                    | 90.5              | -0.218 | 3.641 |
| 5              | 100                    | 110.6             | -0.241 | 5.229 |
| 6              | 100                    | 150.8             | -0.243 | 4.451 |

29

30 Table S2. The detailed information of three selected periods.

|                         | Periods                                                                           | Days |
|-------------------------|-----------------------------------------------------------------------------------|------|
| Long-range<br>Transport | 14-20 October; 29 October-1 November; 3-4 November; 7-10<br>November; 14 November | 18   |
| Urban Air<br>Masses     | 7-9 October; 23-27 October; 1-2 November; 13 November                             | 11   |
| Coastal Air<br>Masses   | 2-4 October; 10-12 October; 22 October; 12 November                               | 8    |

31

32

33

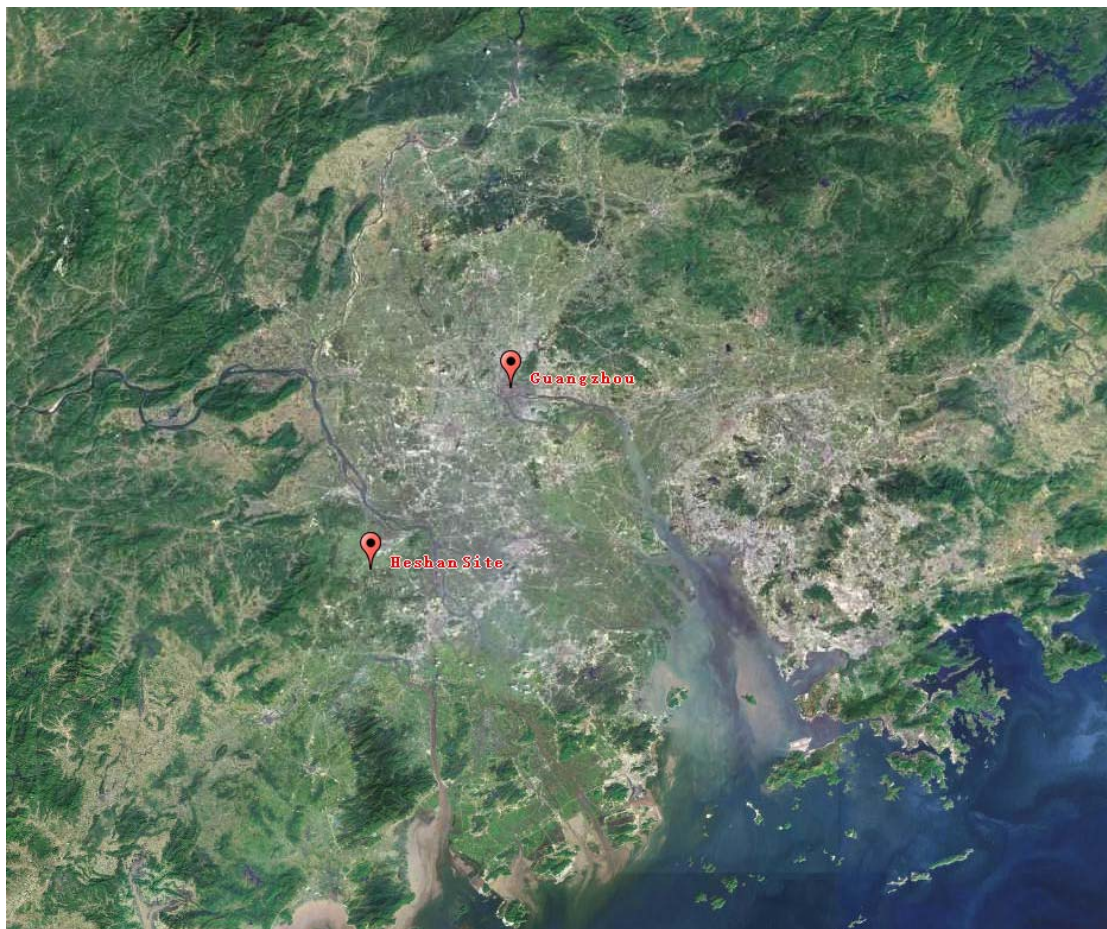

34

35 Figure S1. Location of the measurement site and Guangzhou city. This map was obtained from Map  
36 World.

37

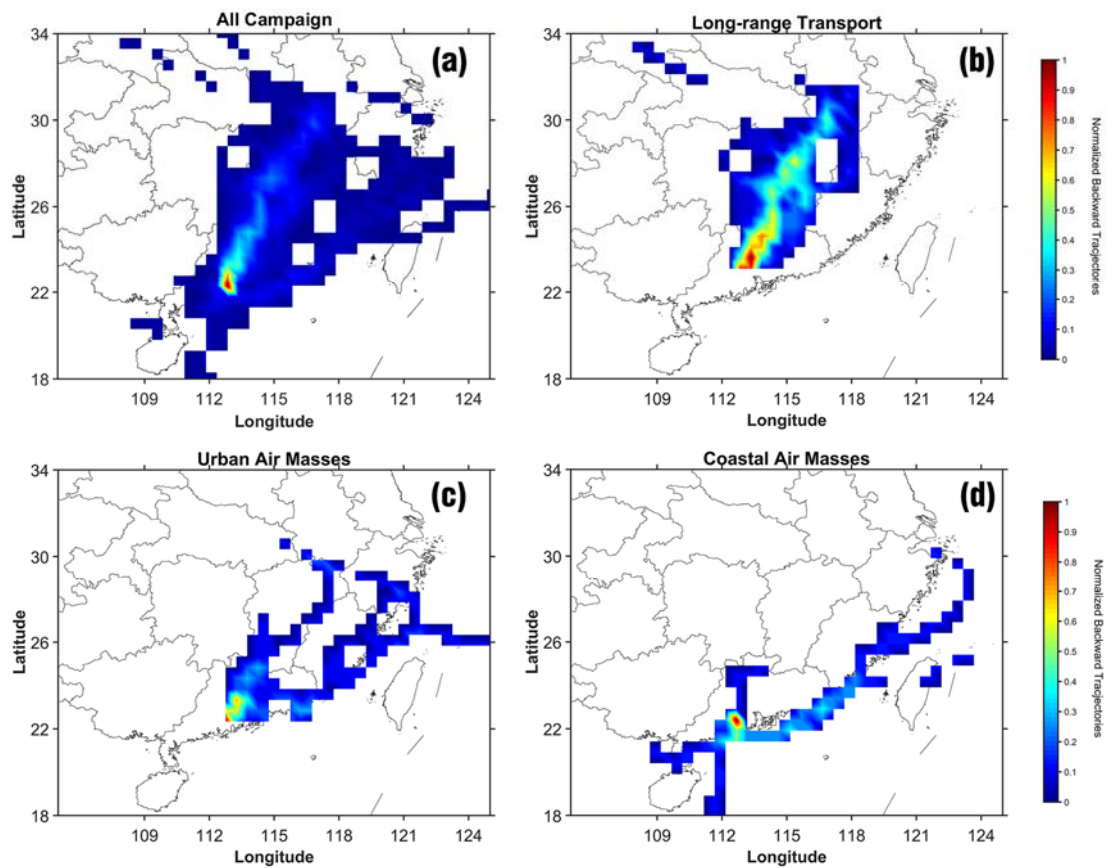

38

39 Figure S2. Normalized 72 hours backward trajectories arriving at the measurement site during (a)  
 40 the whole measurement, (b) long-range transport period, (c) urban air masses period, and (d)  
 41 coastal air masses period.  
 42

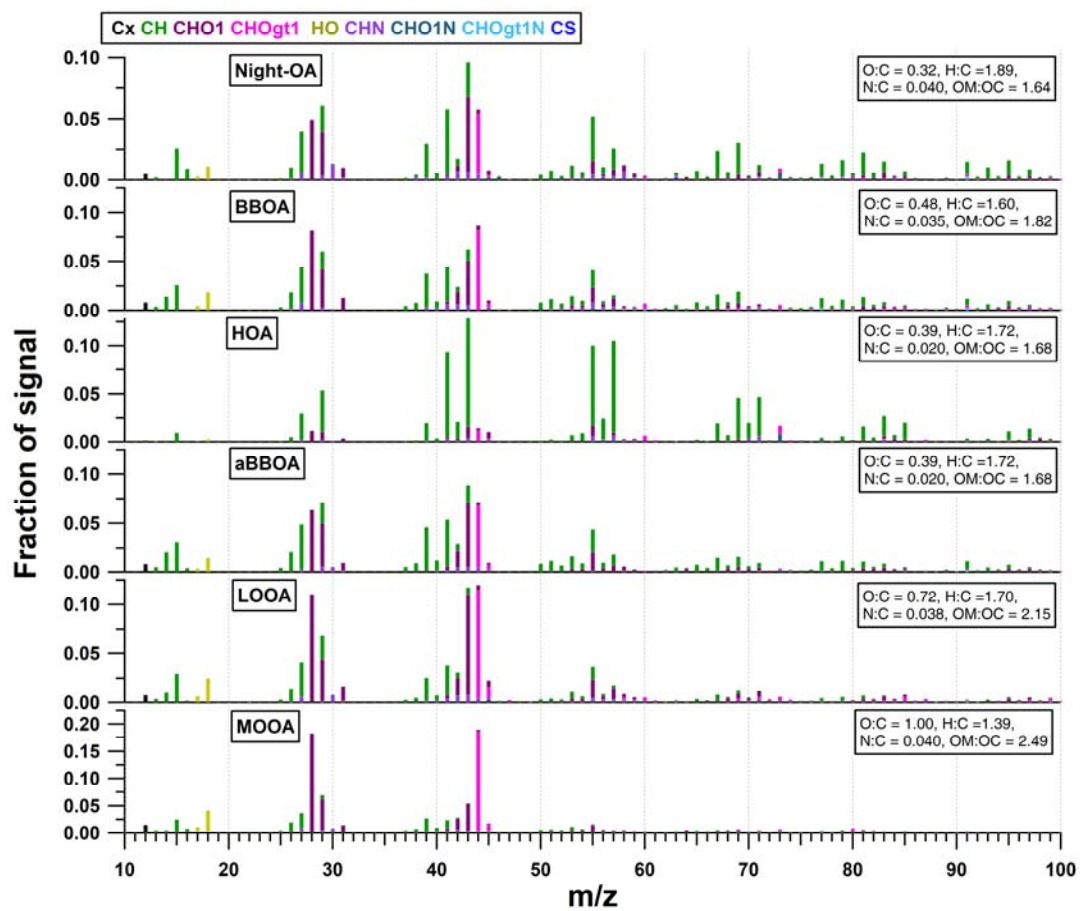

43

44 Figure S3. Mass spectral profile of six OA factors. The colors represent different family groups.

45

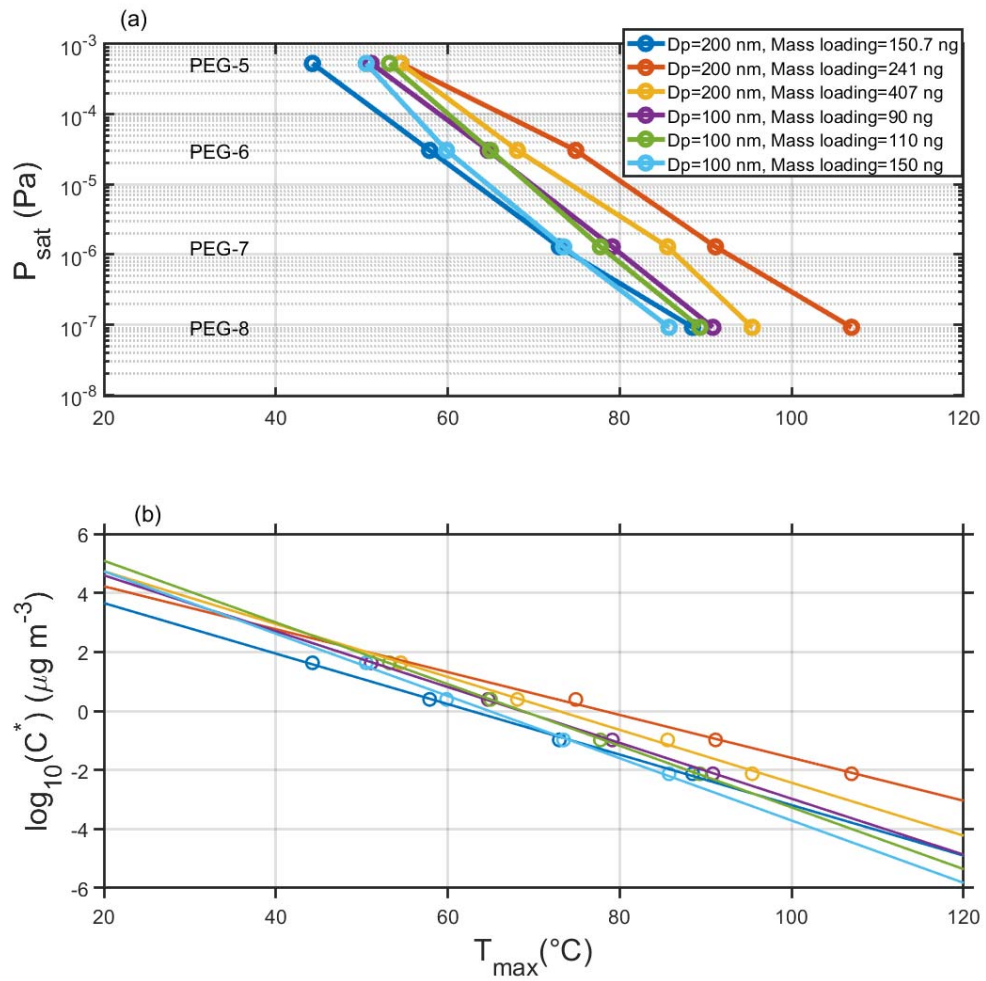

46  
 47 Figure S4. (a) Measured  $T_{max}$  vs  $P_{sat}$  literature values for PEG 5-8 at different diameters and  
 48 collected mass loadings and (b) corresponding fitted calibration lines.  
 49

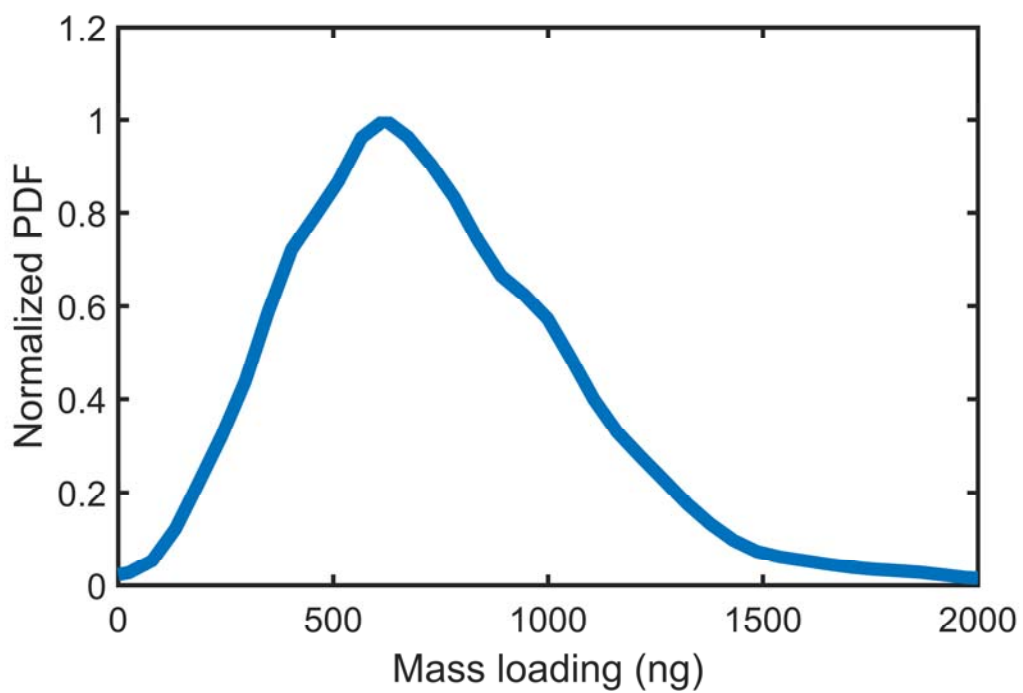

50

51 Figure S5. Normalized probability density function of collected mass loading on the filter of the  
52 FIGAERO-I-CIMS. The collected mass loading is calculated based on collection time, flow rate  
53 through the filter, and the organic concentration measured by the SP-AMS.

54



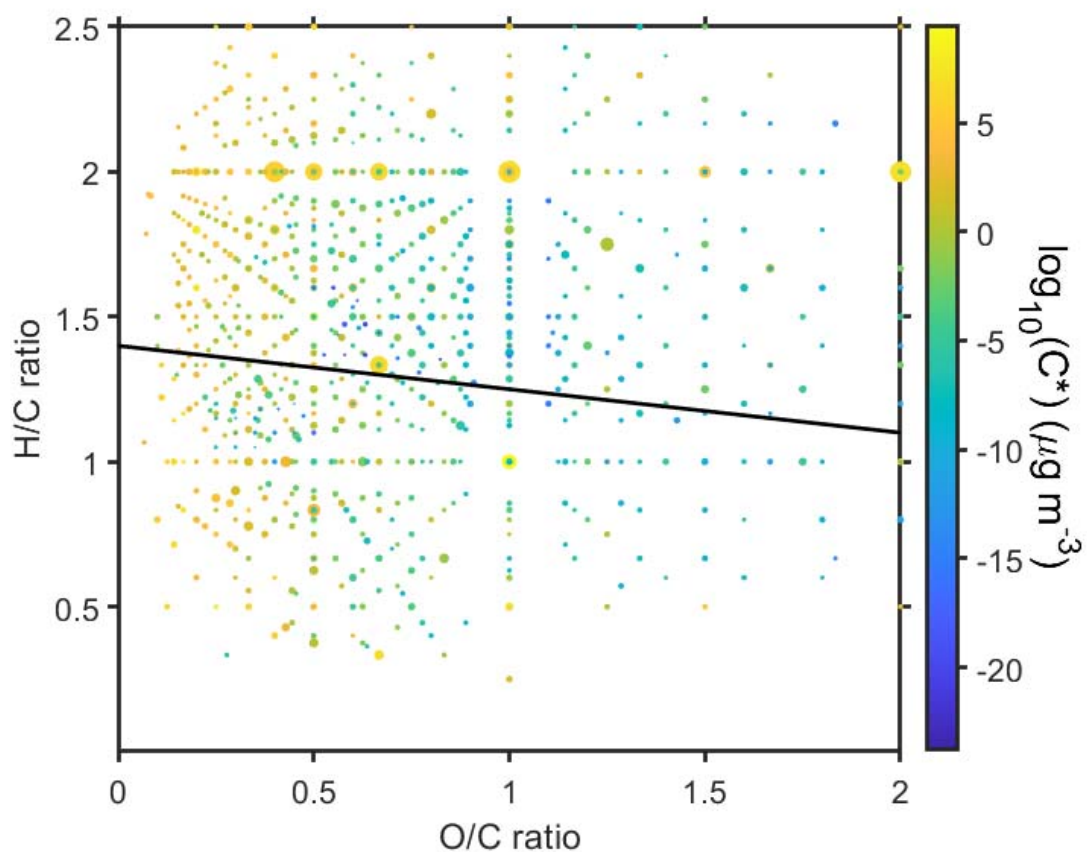

55

56 Figure S6. Van-Krevelen diagram (O/C ratio versus H/C ratio) of gas-phase organic compounds  
 57 measured by FIGAERO-CIMS. The symbol size is proportional to the mass concentration of organic  
 58 vapors and the color code represents the volatility. The black solid line divided the organic vapors  
 59 potentially formed through the autoxidation pathway (upper regime) and multi-generation OH  
 60 oxidation pathway (lower regime)(Wang et al., 2022; Wang et al., 2020).

61

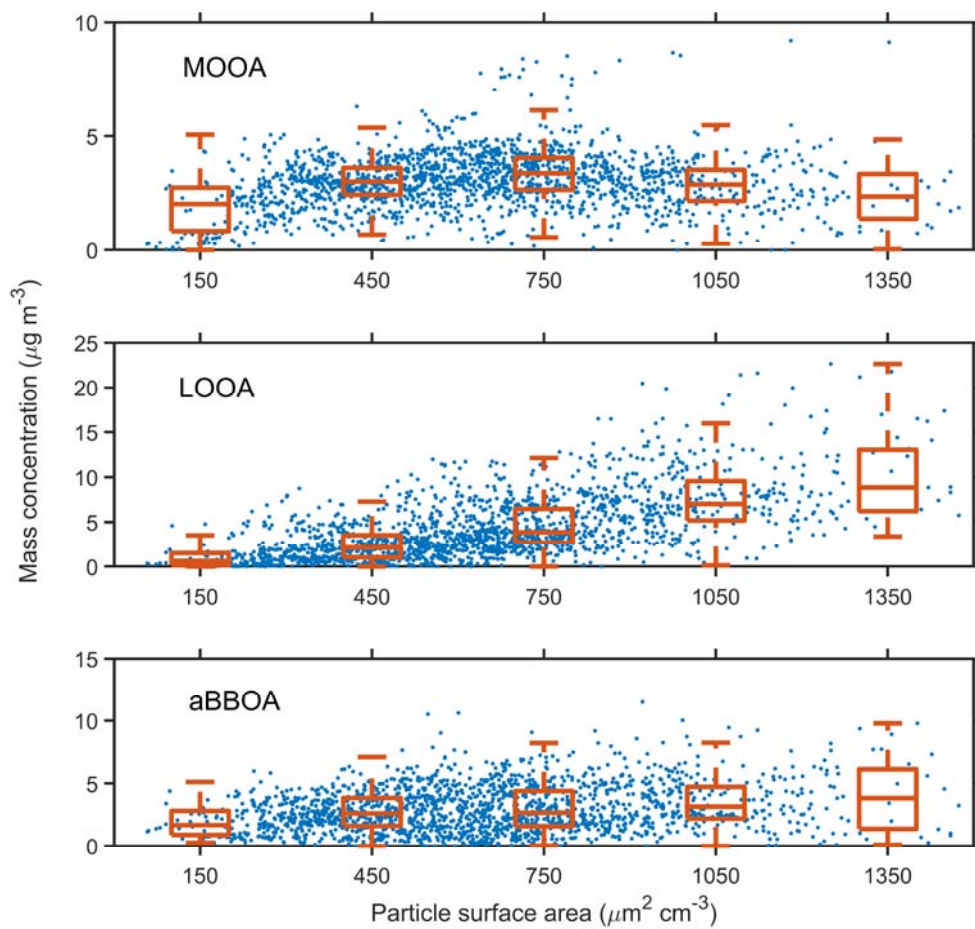

62

63 Figure S8. Relationship between particle surface area and SOA factors (MOOA, LOOA and  
 64 aBBOA).

65

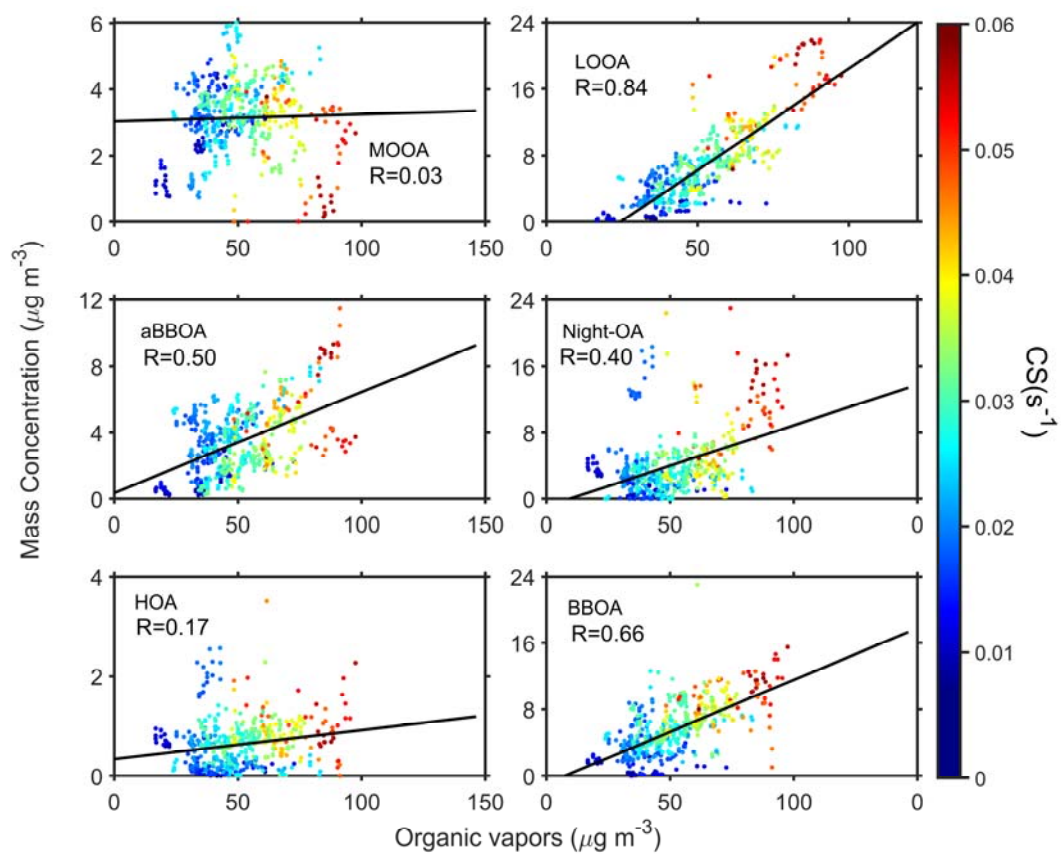

66

67 Figure S8. Relationship between the concentration of organic vapors and six OA PMF factors. The  
 68 color represents the CS values.

69

70

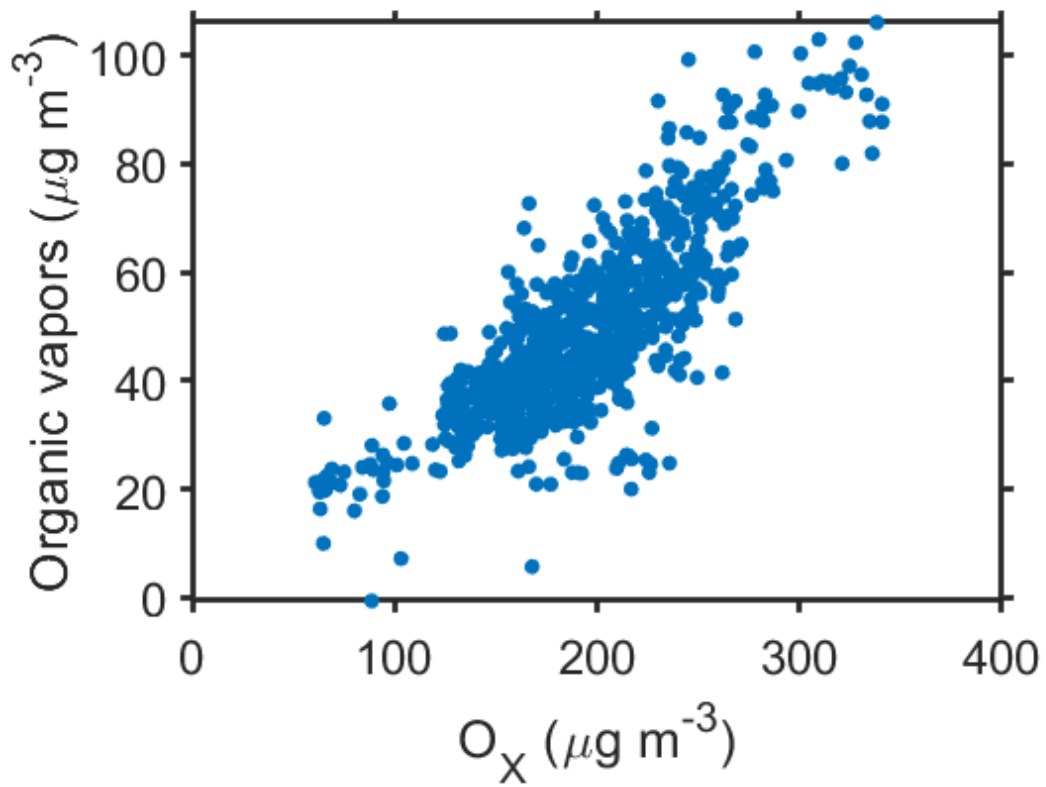

71

72 Figure S9. Relationship between odd-oxygen ( $O_X$ ,  $O_X=O_3+NO_2$ ) and the concentration of organic  
73 vapors measured by the FIGAERO-CIMS in the afternoon (10:00-16:00 LT).

74

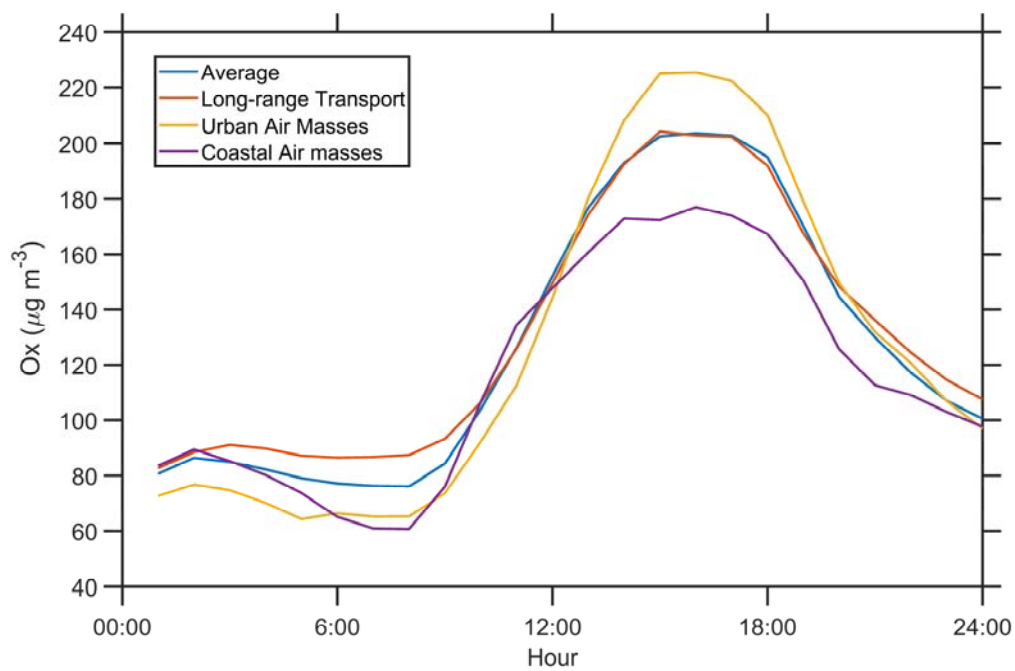

75

76 Figure S10. The average diurnal variation of O<sub>x</sub> during the whole campaign, long-range transport,  
 77 urban air masses, and coastal air masses periods.

78

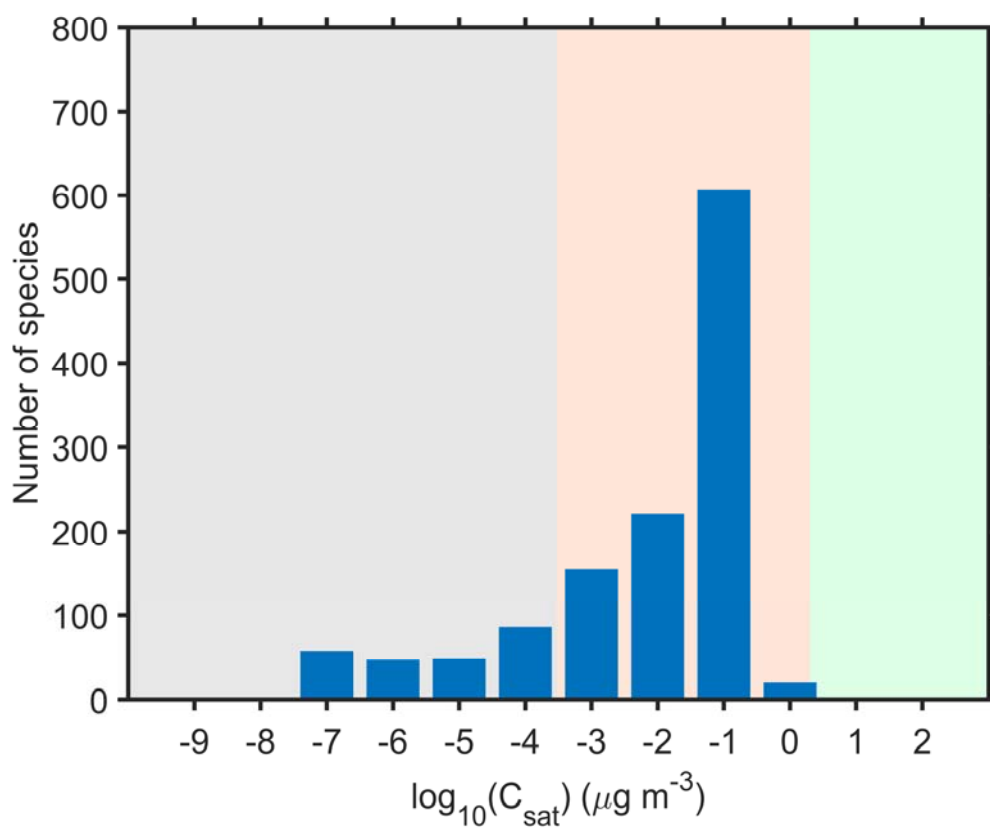

79

80 Figure S11. Volatility distribution of the number of calibrated and semi-quantified species  
 81 measured by the FIGAERO-CIMS.

82

83

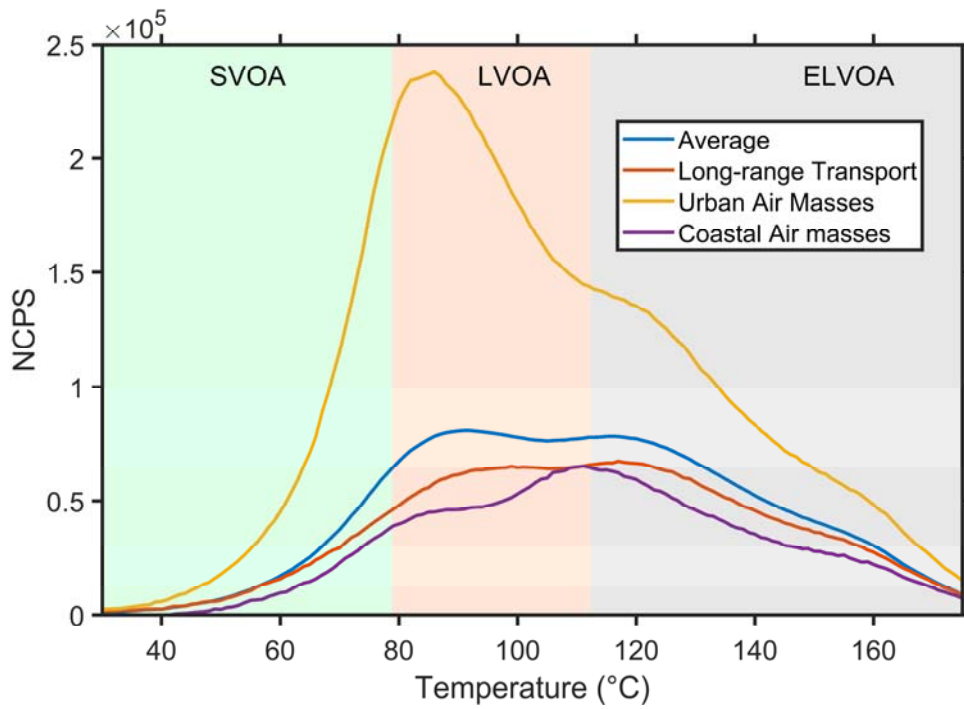

84

85 Figure S12. Average sum thermograms measured by the FIGAERO-CIMS in the afternoon  
 86 (12:00-16:00 LT) during the whole campaign, long-range transport, urban air masses, and coastal  
 87 air masses periods.

88

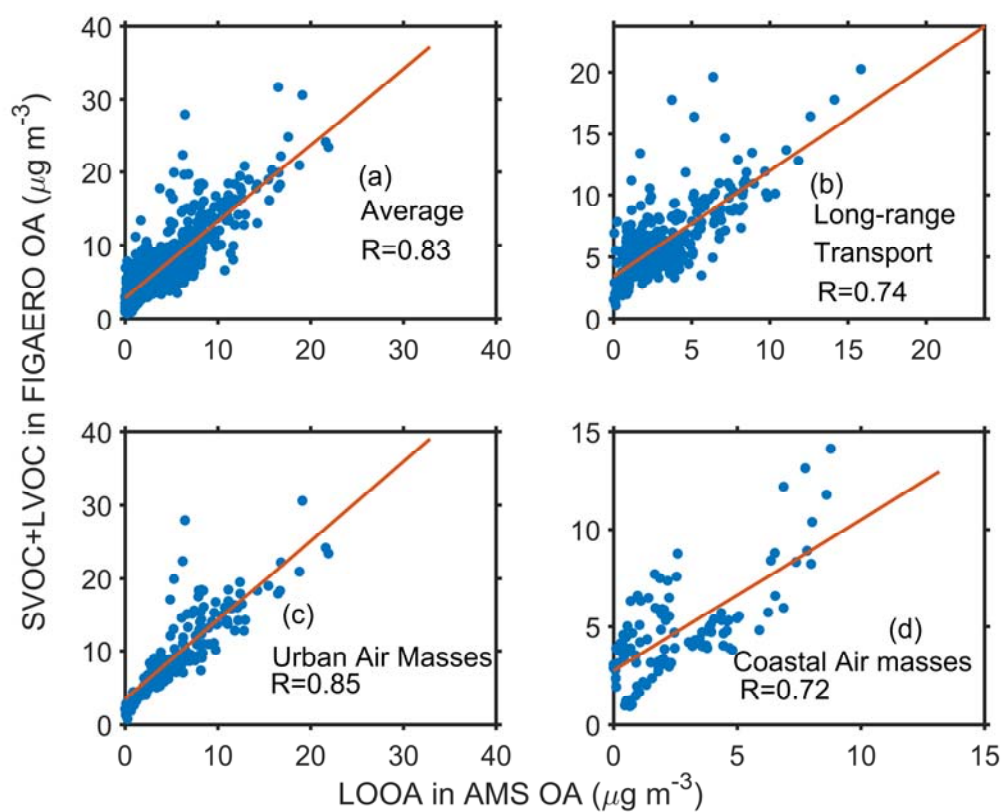

89

90 Figure S13. Relationship between the SVOC+LVOC in FIGAERO OA and LOOA in AMS OA  
 91 during (a) the whole campaign, (b) long-range transport, (c) urban air masses, and (d) coastal air  
 92 masses periods.

93



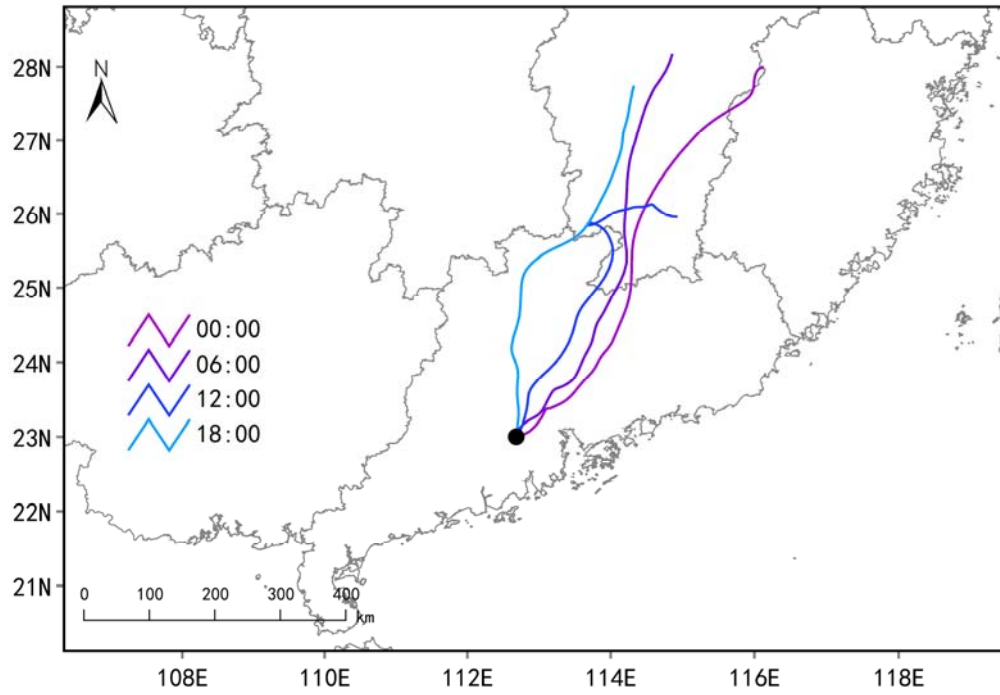

94  
95 Figure S14. 72h backward trajectories arriving at the measurement site with 500 m height at  
96 00:00, 06:00, 12:00, and 18:00 on 2 November 2019.

97  
98

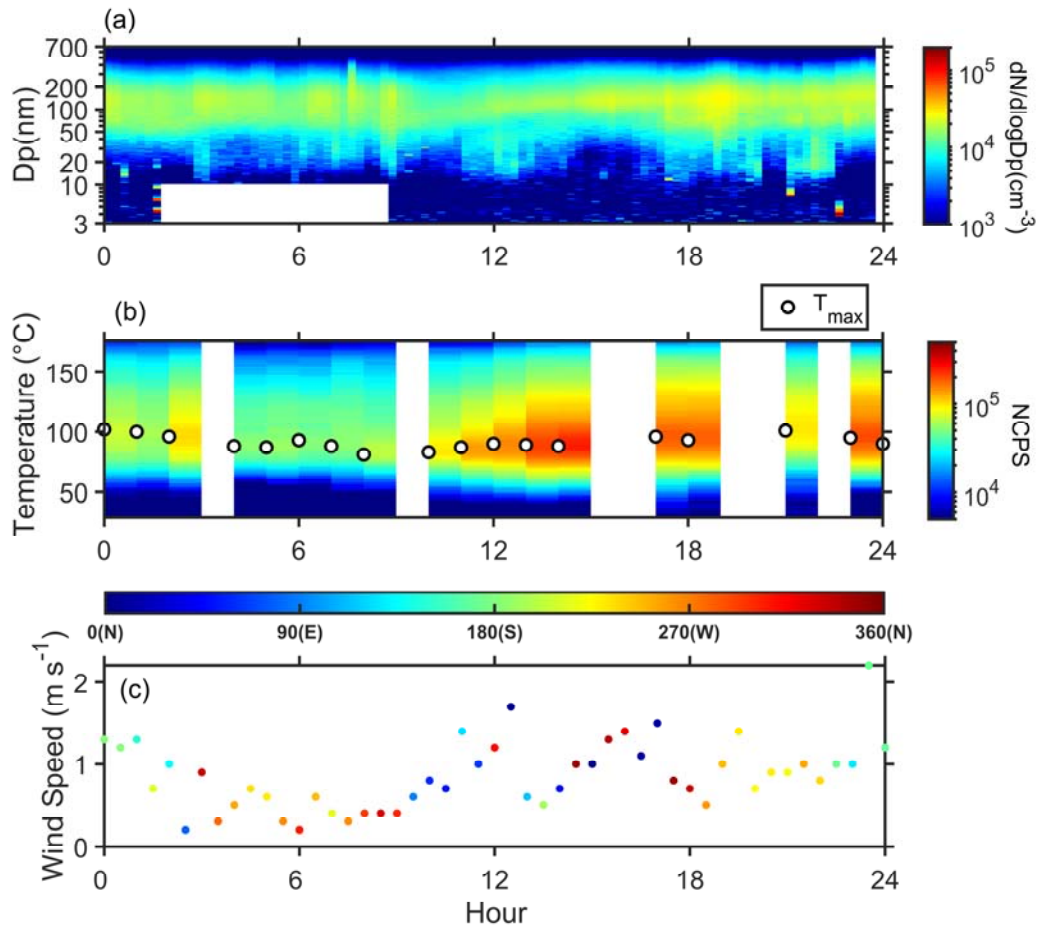

99

100 Figure S15. Variation of (a) PNSD, (b) sum thermograms, and (c) wind speed and direction on 2  
 101 November 2019.

102

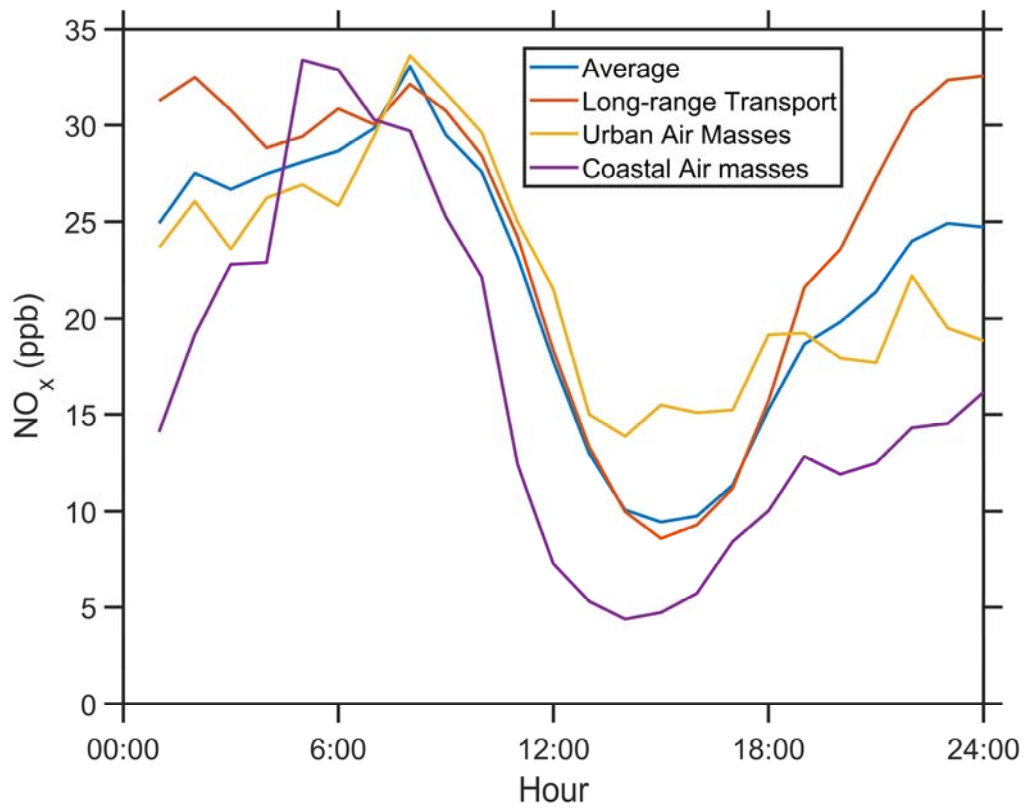

103

104 Figure S16. The average diurnal variation of  $\text{NO}_x$  during the whole campaign and three selected  
 105 periods.

106

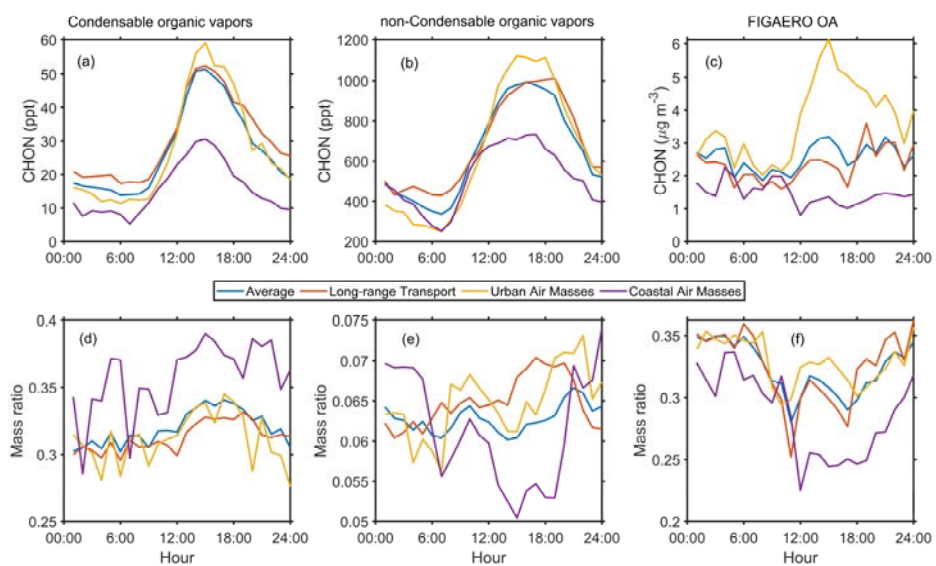

107

108 Figure S17. Diurnal variation of CHON compounds in (a) condensable organic vapors, (b) non-

109 condensable organic vapors, and (c) FIGAERO OA and (d-f) their corresponding mass ratio.

110

## 111 **References**

- 112 Wang, M., Chen, D., Xiao, M., Ye, Q., Stolzenburg, D., Hofbauer, V., Ye, P., Vogel, A. L., Mauldin, R.  
113 L., Amorim, A., Baccarini, A., Baumgartner, B., Brilke, S., Dada, L., Dias, A., Duplissy, J., Finkenzeller,  
114 H., Garmash, O., He, X.-C., Hoyle, C. R., Kim, C., Kvashnin, A., Lehtipalo, K., Fischer, L., Molteni, U.,  
115 Petäjä, T., Pospisilova, V., Quéléver, L. L. J., Rissanen, M., Simon, M., Tauber, C., Tomé, A., Wagner, A.  
116 C., Weitz, L., Volkamer, R., Winkler, P. M., Kirkby, J., Worsnop, D. R., Kulmala, M., Baltensperger, U.,  
117 Dommen, J., El-Haddad, I., and Donahue, N. M.: Photo-oxidation of Aromatic Hydrocarbons Produces  
118 Low-Volatility Organic Compounds, *Environmental Science & Technology*, 54, 7911-7921,  
119 10.1021/acs.est.0c02100, 2020.
- 120 Wang, Y., Clusius, P., Yan, C., Dällenbach, K., Yin, R., Wang, M., He, X.-C., Chu, B., Lu, Y., Dada, L.,  
121 Kangasluoma, J., Rantala, P., Deng, C., Lin, Z., Wang, W., Yao, L., Fan, X., Du, W., Cai, J., Heikkinen,  
122 L., Tham, Y. J., Zha, Q., Ling, Z., Junninen, H., Petäjä, T., Ge, M., Wang, Y., He, H., Worsnop, D. R.,  
123 Kerminen, V.-M., Bianchi, F., Wang, L., Jiang, J., Liu, Y., Boy, M., Ehn, M., Donahue, N. M., and  
124 Kulmala, M.: Molecular Composition of Oxygenated Organic Molecules and Their Contributions to  
125 Organic Aerosol in Beijing, *Environmental Science & Technology*, 56, 770-778,  
126 10.1021/acs.est.1c05191, 2022.
- 127
